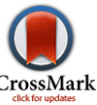

## Correction

# Correction: Population Bottlenecks during the Infectious Cycle of the Lyme Disease Spirochete *Borrelia burgdorferi*

## The PLOS ONE Staff

The first author's current address is not indicated. The current address for Ryan O. M. Rego is Biology Centre, Institute of Parasitology, Academy of Sciences of the Czech Republic, Ceske Budejovice, Czech Republic.

## Reference

1. Rego ROM, Bestor A, Štefka J, Rosa PA (2014) Population Bottlenecks during the Infectious Cycle of the Lyme Disease Spirochete *Borrelia burgdorferi*. PLoS ONE 9(6): e101009. doi:10.1371/journal.pone.0101009

---

**Citation:** The PLOS ONE Staff (2014) Correction: Population Bottlenecks during the Infectious Cycle of the Lyme Disease Spirochete *Borrelia burgdorferi*. PLoS ONE 9(9): e108612. doi:10.1371/journal.pone.0108612

**Published:** September 17, 2014

**Copyright:** © 2014 The PLOS ONE Staff. This is an open-access article distributed under the terms of the Creative Commons Attribution License, which permits unrestricted use, distribution, and reproduction in any medium, provided the original author and source are credited.
